# Supplementary material
Source: publisher figshare collection journal article supplement (https://gsapubs.figshare.com/ndownloader/files/22744136)
Supplement: Supplementary file 1 [file 22744136]

*Special Paper 306*

*Chapter 7*

Sequence Stratigraphy of an Apparently Noncyclic Carbonate Succession: Recognizing Subaerial Exposure in a Largely Subtidal, Middle Ordovician Stratigraphic Sequence in Eastern Tennessee

D. M. Steinhauﬀ and K. R. Walker

*in* Paleozoic Sequence Stratigraphy: Views from the North American Craton

Brian J. Witzke, Greg A. Ludvigson, and Jed E. Day, eds.

| Carbonate Lithologic Criteria |                                  |                                |         |                          |                                                      |                                                          |                                      |                                                              |                  |                                                              |                                                                 |                                             |                                                                                                    | Biotic Criteria                                                                            |  |  |  | Other Criteria |  |
|-------------------------------|----------------------------------|--------------------------------|---------|--------------------------|------------------------------------------------------|----------------------------------------------------------|--------------------------------------|--------------------------------------------------------------|------------------|--------------------------------------------------------------|-----------------------------------------------------------------|---------------------------------------------|----------------------------------------------------------------------------------------------------|--------------------------------------------------------------------------------------------|--|--|--|----------------|--|
| Lithology/Micro-facies*       | Rock Name                        | Matrix                         | Peloids | Aggregate Grains         | Coated Grains                                        | Sedimentary Structures                                   | Primary Organisms                    | Accessory Organisms                                          | Diversity        | Biota Abundance                                              | Flora                                                           | Whole Fossils vs. Fragments                 | Lateral and Vertical Facies Relations                                                              | Comments                                                                                   |  |  |  |                |  |
| A / B                         | Wackestone                       | Mud                            | Rare    | Rare                     | Rare                                                 | Fenestrae; horizontal cavities; keystone vugs, rare      | Pelmatozoa, arborescent bryozoa      | Rare                                                         | Low              | Low to moderate                                              | Green algae, rare                                               | Whole fossils                               | Gradational with facies 9, 10g, 12p, 12g (rarely), 16, 17, and 19.                                 | Preserved infauna and epifauna and vertical burrows.                                       |  |  |  |                |  |
| B / 9                         | Bioclastic Wackestone/ Packstone | Mud                            | Rare    | Rare                     | Rare                                                 | Bioturbated sediment; Domate algal laminae, rare         | Pelmatozoa, bryozoans                | Thick-shelled trilobites, sponge spicules                    | Moderate         | Moderate to low                                              | Green algae rare, red algae less common                         | Whole bryozoans, other fossils as fragments | Gradational with facies 8, 10g, 12p, 12g, 16, 17, 19, 22, shale and siltstone beds, < 0.5 m thick. | Occurs as beds 0.5 to 2 m thick with thin, inter-fingering grainstone beds, < 0.5 m thick. |  |  |  |                |  |
| C / 10g                       | Grainstone/ Cortoid Grain-stone  | Spar with small amounts of mud | Rare    | Rare                     | Very abundant to abundant, most are partially coated | ?Megaripples                                             | Pelmatozoa                           | Gastropods, thick-shelled trilobites, brachiopods            | Moderate to high | Moderate to high, <u>Girzaneella</u> <u>Oncolites</u> Common | Green algae abundant to rare, red algae rare                    | Fragments rounded and worn                  | Gradational with facies 8, 9, 11, 12g, 12p, 13, 16 and 22.                                         | Generally thick bedded, 1+ m thick. Grains more worn, lower coated grains than facies 11   |  |  |  |                |  |
| D / 11                        | Grainstone/ Cortoid Grain-stone  | Spar with small amounts of mud | Rare    | Abundant oncooids common | Very abundant to abundant, most are partially coated | Not observed                                             | Pelmatozoa, encrusting bryozoa       | Gastropods, thick-shelled trilobites, articulate brachiopods | High             | Moderate to high                                             | Green algae rare, red algae less common                         | Fragments                                   | Gradational with facies 10g, 12g and 16.                                                           | No worn grains. Coated grains well developed, oncooids common.                             |  |  |  |                |  |
| E / 12g                       | Echinoderm Grainstone            | Spar                           | Rare    | Rare                     | Rare                                                 | Megaripples                                              | Pelmatozoa, bryozoa                  | Thick-shelled trilobites                                     | Moderate         | High                                                         | Green algae abundant to sometimes absent. Red algae less common | Fragments                                   | Gradational with facies 9, 10g, 11, 12p, 13, 17, 18 and 19 (rarely).                               | Generally occurs as amalgamated beds, 1 to 2 m thick.                                      |  |  |  |                |  |
| F / 12p                       | Echinoderm/ Bryozoan Packstone   | Mud and lesser amounts of spar | Rare    | Rare                     | Rare                                                 | ?Flaser bedding; keystone vugs; flat algal laminae, rare | Pelmatozoa, bryozoa                  | Thick-shelled trilobites                                     | Moderate         | High                                                         | Green algae abundant to sometimes absent. Red algae less common | Fragments very abundant, some fossils whole | Gradational with facies 8, 9, 10g, 12g, 13, 16, 17, 19 and 22.                                     | Generally thick bedded, one or more meters thick.                                          |  |  |  |                |  |
| G / 13                        | Oncoid Grainstone                | Spar, mud is rare              | Rare    | Rare to present          | Very abundant to abundant, oncooids well developed   | ?Megaripples; organic bands; flat algal laminae, rare    | Thick-shelled trilobites, gastropods | Pelmatozoa, brachiopods                                      | High             | Low to moderate                                              | Green algae abundant to rare, red algae rare                    | Fragments                                   | Gradational with facies 10g, 11, 12g, 12p, 16, 17, 19, and 22.                                     | No worn grains, oncooids better developed than facies 10 and 11.                           |  |  |  |                |  |

| Lithology | Carbonate Lithologic Criteria         |                                  |                               |                     |                                                        |                                                                        | Biotic Criteria                                         |                                                                            |     |                               | Other Criteria                                                           |                                                          |                                                                                                            |                                                                                                                        |
|-----------|---------------------------------------|----------------------------------|-------------------------------|---------------------|--------------------------------------------------------|------------------------------------------------------------------------|---------------------------------------------------------|----------------------------------------------------------------------------|-----|-------------------------------|--------------------------------------------------------------------------|----------------------------------------------------------|------------------------------------------------------------------------------------------------------------|------------------------------------------------------------------------------------------------------------------------|
| H / 14    | Texture:<br>Conglomeratic<br>lag      | Grain                            | Time                          | Time                | Partially<br>coated<br>grains                          | Not observed                                                           | Pelmatozoa,<br>bryozoa, thick-<br>shelled<br>trilobites | Rare                                                                       | Low | Low                           | Green algae<br>abundant, red<br>algae present                            | Fragments<br>reworked                                    | Gradational<br>with facies 9,<br>10g, 21, and<br>22.                                                       | Very rare<br>lithology, few<br>thin beds, < 1<br>m thick.<br>Blackened and<br>phos-phate<br>coated grains<br>abundant. |
| I / 16    | Peloidal<br>Granestone                | Spar, small<br>amounts of<br>mud | Very<br>abundant              | Rare to<br>abundant | Rare to<br>common,<br>generally<br>partially<br>coated | Rare<br>?megacrinites,<br>?laser bedding                               | Ostracodes                                              | Rare,<br>sometimes<br>with<br>gastropods                                   | Low | Low to<br>moderate            | Green algae<br>rare to<br>common,<br>red algae less<br>common            | Whole<br>ostracodes,<br>other fossils<br>as fragments    | Gradational<br>with facies 9,<br>10g, 11, 12g,<br>12p, 17, 18,<br>19, 19f, 19f<br>shale, and<br>siltstone. | Occurs as<br>anagranulated<br>beds, 0.5<br>to 2 m thick.<br>Superficial<br>ooids present.                              |
| J / 17    | Grainstone/<br>Peloidal<br>Granstone  | Spar, mud is<br>rare             | Very<br>abundant to<br>common | Very<br>abundant    | Rare to<br>common,<br>generally<br>partially<br>coated | Rare                                                                   | Ostracodes,<br>sometimes<br>with<br>gastropods          | Pelmatozoa,<br>articulated<br>brachio-pods,<br>thick-shelled<br>trilobites | Low | High to<br>moderate           | Green algae<br>rare to<br>common,<br>red algae less<br>common            | Whole<br>ostracodes,<br>other fossils<br>as fragments    | Gradational<br>with facies 8,<br>9, 10g, 11,<br>12g, 12p, 19,<br>and 22.                                   | Superficial<br>ooids pre-sent,<br>prob-lematic<br>algae <i>Ninia</i><br>common to<br>abundant.                         |
| K / 18    | Dasycladacean<br>Granstone            | Spar                             | Rare                          | Present             | Abun-dant<br>to present,<br>generally<br>one-sided     | ?Megacrinites,<br>Intraclasts<br>present in some<br>beds               | Dominated by<br>green algae                             | Pelmatozoa,<br>thick-shelled<br>trilobites                                 | Low | Low<br>organism<br>abun-dance | Green algae<br>very<br>abundant,<br>Red algae<br>abundant to<br>present. | Whole fossil<br>algae, other<br>fossils as<br>fragments. | Gradational<br>with facies<br>11, 12g, 12p<br>and 16.                                                      | Rare lithology,<br>only a few<br>beds, about 1<br>m thick.                                                             |
| L / 19    | Wackestone/<br>Mudstone               | Mud                              | Very<br>abundant to<br>common | Rare to<br>common   | Present                                                | Fenestrae<br>present, but not<br>abundant,<br>organic bands<br>present | Ostracodes<br>gastropods,<br>encrusting<br>bryozoans    | Rare or<br>absent                                                          | Low | Low                           | Green algae<br>rare, red algae<br>absent                                 | Whole<br>ostracodes,<br>other fossils<br>as fragments    | Gradational<br>with Facies<br>8, 9, 11, 12p,<br>16, 17, 19f,<br>19f and 22.                                | Generally<br>occurs as<br>massive,<br>discontinuous<br>beds, < 0.5m<br>thick.                                          |
| L / 19f   | Laminated/<br>Wackestone/<br>Mudstone | Mud                              | Abundant<br>to common         | Rare                | Rare                                                   | Flat algal<br>laminae,<br>fenestrae<br>present, but not<br>abundant    | Ostracodes<br>gastropods                                | Rare or<br>absent                                                          | Low | Low                           | Green algae<br>rare, red algae<br>absent                                 | Whole<br>ostracodes,<br>other fossils<br>as fragments    | Gradational<br>with facies<br>19, 19f, 16<br>and 17.                                                       | Laminated<br>beds < 0.5m<br>thick.                                                                                     |
| L / 19F   | Fenestral<br>Wackestone/<br>Mudstone  | Mud                              | Abundant<br>to common         | Rare to<br>present  | Present                                                | Fenestrae,<br>horizontal<br>cavities, flat<br>algal laminae            | Ostracodes                                              | Rare or<br>absent                                                          | Low | Low                           | Green algae<br>rare, red algae<br>present                                | Whole<br>ostracodes,<br>other fossils<br>as fragments    | Gradational<br>with facies<br>19, 19f, 16<br>and 17.                                                       | Bedded as<br>facies 19<br>(above)                                                                                      |
| M / 21    | Spongostrome<br>Mudstone              | Mud                              | Abundant                      | Common              | Partial<br>algal<br>oncooids                           | Flat algal<br>laminae                                                  | Encrusting<br>bryozoans,<br>pelmato-zoans               | ?Ostracodes                                                                | Low | Low                           | Spongio-<br>stroma                                                       | Bryozoans<br>whole,<br>pelmato-<br>zoans as<br>fragments | Gradational<br>with facies<br>14, 16, 17.                                                                  | Very rare<br>lithology, one<br>0.5m bed, ob-<br>served base<br>Rockdell Fm.<br>OIH section.                            |

| Lithology           | Carbonate Lithologic Criteria                                  |                                     |                       |                       |                                                                 |                                                               | Biotic Criteria                                         |              |     |     |                                                                                                   | Other Criteria                            |                                                               |                                                                                             |
|---------------------|----------------------------------------------------------------|-------------------------------------|-----------------------|-----------------------|-----------------------------------------------------------------|---------------------------------------------------------------|---------------------------------------------------------|--------------|-----|-----|---------------------------------------------------------------------------------------------------|-------------------------------------------|---------------------------------------------------------------|---------------------------------------------------------------------------------------------|
| N / 22              | Wackestone/<br>Packstone-<br>Oncoid<br>Wackestone<br>Packstone | Mud                                 | Abundant<br>to common | Common to<br>abundant | Very<br>abundant<br>to abun-<br>dant,<br>generally<br>one-sided | ?Flaser<br>bedding                                            | Thick-shelled<br>trilobites                             | Gastropods   | Low | Low | <u>Girvanella</u><br>oncolites<br>common,<br>green algae<br>abundant, red<br>algae less<br>common | Fragments                                 | Gradational<br>with facies 9,<br>10g, 11, 16,<br>and 17.      | <u>Girvanella</u><br>oncolites<br>common.<br>Problematic<br>algae <u>Nuaia</u><br>abundant. |
| O / 24              | Lithoclastic<br>Granstone/<br>Packstone                        | Spar and mud                        | Abundant              | Abundant<br>to common | Not<br>observed                                                 | Not observed,<br>but intra-clasts<br>abundant in<br>some beds | ?Ostracodes                                             | Not observed | Low | Low | Not observed                                                                                      | Fragments                                 | Gradational<br>with 16, 19,<br>and<br>dolomitic<br>limestone. | Rare lith-ology,<br>only one, 1m<br>thick bed near<br>Knox<br>unconformity                  |
| P Not<br>Numbered   | Dolostone/<br>Dolomitic<br>Limestone                           | Fine-grained<br>dolomite and<br>mud | Rare                  | Not<br>observed       | Not<br>observed                                                 | Laminae                                                       | Rare<br>fragments only                                  | Not observed | Low | Low | ?Stromato-<br>lites                                                                               | Fragments                                 | Gradational<br>with facies<br>16, 17, 19<br>and 24.           | Rare lithology.                                                                             |
| Q Not Num-<br>bered | Siltstone/<br>Carbonate<br>Siltstone                           | N/A                                 | Not<br>observed       | Not<br>observed       | Not<br>observed                                                 | Vertical burrows                                              | Brachio-pods<br>occur in<br>carbonate rich<br>intervals | Not observed | Low | Low | Not observed                                                                                      | Brachio-pods<br>occur as<br>whole fossils | Gradational<br>with facies 9,<br>16, 17, 12p<br>and 19.       | Rare lithology<br>(Benbolt and<br>Bowen Fms.<br>only).                                      |
| R Not Num-<br>bered | Shale/Shaly<br>Carbonate                                       | N/A                                 | Not<br>observed       | Not<br>observed       | Not<br>observed                                                 | ?Bioturbated<br>sediment                                      | Not observed                                            |              | Low | Low | Not observed                                                                                      | Not observed                              | Gradational<br>with facies 9,<br>12p, 16 and<br>17.           | Occurs in<br>upper Benbolt<br>and overlying<br>formations.                                  |
| S Not Num-<br>bered | Bentonite                                                      | Green clay                          | Not<br>observed       | Not<br>observed       | Not<br>observed                                                 | ?Bioturbated<br>sediment                                      | Not observed                                            | Not observed | N/A | N/A | Not observed                                                                                      | N/A                                       | Gradational<br>with facies 9,<br>16, 17, 12p,<br>and 12g.     | Thin beds<br>throughout<br>Middle<br>Ordovician.                                            |

**Key**  
 Very Abundant - Constituent comprises more than 50% of the allochems.  
 Abundant - More than three counts per thin-section observed in all thin-sections representative of facies.  
 Common - At least 1 to 3 counts per thin-section observed in all thin-sections representative of facies.  
 Rare - One to three counts per thin-section observed in many, but not all thin-sections representative of facies.  
 present - Seen in about 1/4 to 1/2 of thin-sections representative of facies.

**Diversity**  
 High >>3 classes of organisms  
 Moderate 2 to 3 Classes  
 Low <3 Classes

**Abundance**  
 >30% Allochems  
 >30% Fossils  
 Moderate >30% Allochems  
 <30% Fossils  
 Low <30% Allochems  
 or  
 <20% Fossils

\*Microfacies numbers generally correspond to standard microfacies of Wilson (1975); however, some microfacies are modified (i.e., 10g, 12g, 12p, 19l and 19f) to account for criteria characteristic of Middle Ordovician limestones, but not generally observed in younger rocks.
